# Supplementary material for: Assessing Mongolian gerbil emotional behavior: effects of two shock intensities and response-independent shocks during an extended inhibitory-avoidance task
Source: PubMed Central journal article supplement (PMC5689020; doi:10.7717/peerj.4009), 2017-11-13

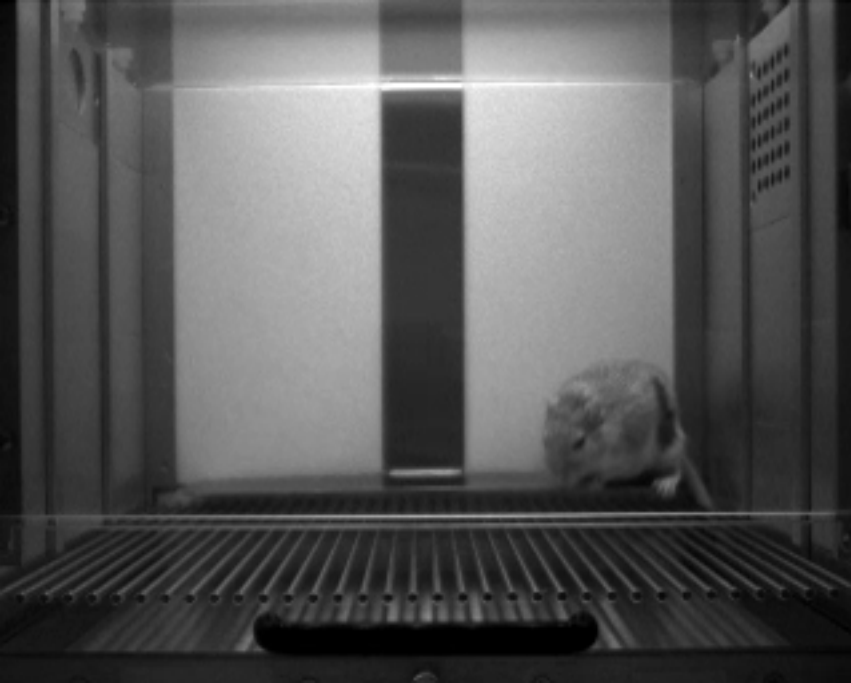

Supplement: peerj-05-4009-s001.pdf [file peerj-05-4009-s001.pdf]
